# Supplementary material for: A functional analysis of the pyrimidine catabolic pathway in Arabidopsis
Source: PubMed Central journal article supplement (PMC2713857; doi:10.1111/j.1469-8137.2009.02843.x), 2009-07
Supplement: nph0183-0117-SD1.pdf [file nph0183-0117-SD1.pdf]

| <b>AGI Locus</b> | <b>Gene Name</b> | <b>Forward 5' -&gt; 3'</b> | <b>Reverse 5' -&gt; 3'</b>    |
|------------------|------------------|----------------------------|-------------------------------|
| At3g18780        | <i>ACT2</i>      | TCCTCACTTTTCATCAGCCG       | ATTGGTTGAATATCATCAGCC         |
| At3g20330        | <i>PYRB</i>      | GAAGTTGTGACTCAGTATCTCC     | CAACTAAGGCTACACTGATGCC        |
| At3g53900        | <i>PYRR</i>      | AACCCTAATCCTTCCTCTTTCC     | TAGCAGGTAAACTGAGGATGC         |
| At3g17810        | <i>PYD1</i>      | TTTCGCCTTGAATCGCTTCTCTGG   | AGATACGGTTTTGGCGATGACGGC      |
| At5g12200        | <i>PYD2</i>      | TGGTATTATTGTCGCTGTGC       | GGAGTAGGTCATCAGTTACC          |
| At5g64370        | <i>PYD3</i>      | AGAGCCTGTTGATGGCGAATCG     | AGAGCCTGTTGATGGCGAATCG        |
| At3g08860        | <i>PYD4</i>      | TAACGGCGGTTAATTCATA        | GGTGTGTTGTAGAAGTGAAAAAGAG     |
| At1g70330        | <i>AtENT1</i>    | CGCTTACATCATCTACTTCACC     | AAAACAGGAACCACAAGCAAGGCG      |
| At2g03590        | <i>AtUPS1</i>    | GCACAATAATCGGATTGGTG       | ATGTTAAGTATCAGAGCAACTACAAATGC |
| At2g03530        | <i>AtUPS2</i>    | GTATCGTGCTTAGCCTCG         | TGTTCTATTTTCGGTAGATGGACC      |

**Table S1** PCR primers used for semiquantitative RT-PCR analyses of relative transcript levels for genes encoding enzymes of pyrimidine nucleotide metabolism, nucleobase transporters, and the reference gene *ACT2*.
