# Supplementary material for: A functional analysis of the pyrimidine catabolic pathway in Arabidopsis
Source: PubMed Central journal article supplement (PMC2713857; doi:10.1111/j.1469-8137.2009.02843.x), 2009-07
Supplement: nph0183-0117-SD2.pdf [file nph0183-0117-SD2.pdf]

| AGI Locus | Gene Name    | Forward 5'→3'            | Reverse 5'→3'            |
|-----------|--------------|--------------------------|--------------------------|
| At3g27740 | <i>CARA</i>  | GCTCAGAATCACAACCTATGCGGT | TGTGTTACTTCTACGCCTCCGG   |
| At1g29900 | <i>CARB</i>  | GAGAAAATCGCGGTGTCTTC     | GTTCCCGAGGTGGCAACTATT    |
| At3g20330 | <i>PYRB</i>  | GGATGAAATCACCGCAGATGTT   | GTCTGAAGTAGGCAGCTCTTGGA  |
| At4g22930 | <i>PYRC</i>  | CACATCACAACCATGGATGCTG   | ACCCACAGACCCTTCTTTGCA    |
| At5g23300 | <i>PYRD</i>  | GCTTGAAGATATTGCAGCGGTG   | TATGATCAGCCCATCCAAGTGC   |
| At3g54470 | <i>PAREF</i> | ATACTGCCTGATTTACCCCTG    | TGCAATCGCACGGAGCTTA      |
| At3g60180 | <i>UMK1</i>  | TGCTAGAATCGAGCCTGCTTTT   | TGGTTCCTGCTCATAATGCGT    |
| At4g25280 | <i>UMK2</i>  | AACCGTGTTCATTTGAGCG      | CGGCCCTGATTACGATTCAAG    |
| At3g18680 | <i>UMK3</i>  | GGATGCTGGCAACTGTGATGA    | GGATGCTGGCAACTGTGATGA    |
| At3g10030 | <i>UMK4</i>  | TGGTAATATTTGGTGGCATCGG   | CCGCATTGATGTCTATAGCTCGA  |
| At5g26667 | <i>UMK5</i>  | CCGAGCAGCATTGAAAAAGTT    | AACAGGCGCTTCTCCATCTCT    |
| At4g09320 | <i>NDK1</i>  | ATTATGATCAAGCCTGACGGC    | GCAGATGACTTCACCGATGAGT   |
| At5g63310 | <i>NDK2</i>  | ACCGGAAGGAACATTGTGCA     | TCACGCTTGCCGTTTTTCAG     |
| At4g11010 | <i>NDK3</i>  | CCTGTTATTGCCATGGTCTGG    | GCTCCAATCAGTTTACGTCCGT   |
| At4g23900 | <i>NDK4</i>  | TGCTTCTAGAGCAGCCAGGTCT   | CGGCCTTCGGAGAAGAAA       |
| At1g17410 | <i>NDK5</i>  | CCCTCACAGCATCAGAGCATT    | AGCCGTGCACACAGTTCTTCT    |
| At1g73980 | <i>UK1</i>   | GCCCTAAAGAAGCCCTCTCAAG   | ACGCCCGCGTGAAGATATTT     |
| At1g26190 | <i>UK2</i>   | TGAAGTAATGGCCCTACCAGATG  | AGACGCTCGTAAGAGTGCTTCC   |
| At1g05620 | <i>URH1</i>  | AGGTTTGAGGAAGCGAACGAG    | ATCAACCGTCACTGCCACTTTT   |
| At2g36310 | <i>URH2</i>  | GCCTCAAGAGATGGAACGGAA    | CGTCCAAGCAACTGATATCGGT   |
| At1g55810 | <i>UPRT1</i> | ATGCACACTTAATCCGCGACT    | ACCAAACGTATCAATCGATCGG   |
| At3g27440 | <i>UPRT2</i> | CTTGACCCTGTTCTAGCATCAGG  | TGATTCTGGAACCTCCCTTGCTT  |
| At3g27190 | <i>UPRT3</i> | ACGGAGACAATGGAATGCAGC    | CGCTCGGAGATATCACTTGGA    |
| At3g53900 | <i>PYRR</i>  | TTGAAGGAACGTGGTTTGTCTG   | GCAGCAATCGCACAAATCAC     |
| At4g26510 | <i>UPRT5</i> | CAGGAAACTCAGCGTTGAAG     | TGATGTTTCCCTCAGGTACGC    |
| At5g40870 | <i>UPRT6</i> | CGACATATCTGAACGCCATGTC   | GCCGAGTTACCTGTGGCTAAGA   |
| At3g17810 | <i>PYD1</i>  | AAAACCCTTTGCGCTGAGCT     | AAGTACTGCAGCGAATGCCCT    |
| At5g12200 | <i>PYD2</i>  | AATGGTGTAAATGGCCTTGAGG   | CATCGTGTCCCATATCAAGTGC   |
| At5g64370 | <i>PYD3</i>  | ACCCTTCAGCAACTGTTGGTGA   | CGGCATTTTCGTGCCTCAATA    |
| At5g60390 | <i>EF1a</i>  | TGAGCAGCTCTTCTTGCTTTCA   | GGTGGTGGCATCCATCTTGTTACA |
| At3g18780 | <i>ACT2</i>  | TGGTGACGCTGGTATGGTTA     | TCCTTCTGTCCACGCTCTT      |
|           |              | TCCCTCAGCACATTCCAGCAGAT  | AACGATTCTGGACCTGCCTCATC  |
|           |              | ACCAGCTCTTCCATCGAGAA     | GGGCATCTGAATCTCTCAGC     |
| At4g05320 | <i>UBQ10</i> | CACACTCCACTTGGTCTTGCGT   | TGGTCTTTCCGGTGAGAGTCTTCA |
|           |              | GTCGACCCTTCACTTGGTGT     | CCTTGACGTTGTCAATGGTG     |

**Table S2** PCR primers used in quantitative real-time RT-PCR analyses of relative transcript levels for genes of pyrimidine nucleotide metabolism and three reference genes.
