# Supplementary material for: A functional analysis of the pyrimidine catabolic pathway in Arabidopsis
Source: PubMed Central journal article supplement (PMC2713857; doi:10.1111/j.1469-8137.2009.02843.x), 2009-07
Supplement: nph0183-0117-SD3.pdf [file nph0183-0117-SD3.pdf]

| <b>Insert</b> | <b>Primer Name</b> | <b>Forward 5'→3'</b>      | <b>Primer Name</b> | <b>Reverse 5'→3'</b>     |
|---------------|--------------------|---------------------------|--------------------|--------------------------|
| <i>pyd1-1</i> | GABI_251F09L       | CTCGTGCCTCATGGTATGC       | GABI_251F09R       | CCTTATAAGAGTATCCCCCTGGAG |
| <i>pyd1-2</i> | SALK_083897L       | CCTGGTTTTTCAACCATTTTGT    | SALK_083897R       | CGGATTTTAGTGACACCCTAGC   |
| <i>pyd2-1</i> | SALK_038919L       | CTGACTTGACTGGTTTCTTGCTT   | SALK_038919R       | AAAAAGAAGCTTCGAAAGAGCAT  |
| <i>pyd2-2</i> | GABI_114F11L       | CTCTTGCCTCTGTAAAGCTTTGTT  | GABI_114F11R       | TGGAAAGGGCATCTTGTAGG     |
| <i>pyd3</i>   | SALK_016594L       | TATTACTTGCTTGGTGGCAGAA    | SALK_016594R       | GCCTGCAAGTTTTAAGGAACAT   |
| GABI          | GABI_L             | CCCATTTGGACGTGAATGTAGACAC |                    |                          |
| SALK          | SALK_Lbb1          | GCGTGGACCGCTTGCTGCAACT    |                    |                          |

**Table S3** PCR primers used for genotyping of *pyd* mutants.
