# Supplementary material for: A functional analysis of the pyrimidine catabolic pathway in Arabidopsis
Source: PubMed Central journal article supplement (PMC2713857; doi:10.1111/j.1469-8137.2009.02843.x), 2009-07
Supplement: nph0183-0117-SD4.pdf [file nph0183-0117-SD4.pdf]

| Primer Name         | Forward 5'→3'           | Primer Name        | Reverse 5'→3'            |
|---------------------|-------------------------|--------------------|--------------------------|
| PYD1-268F           | GTCATCGCCAAAACCGTATC    | PYD1-342R          | GGTTCGTAGCCGAGCATATC     |
| PYD1-530F           | TTGAGCAAACCTGGTGTGATGC  | PYD1-590R          | TCTGGCATAACCATGAGGACA    |
| PYD1-613F           | GGACAAGATTGTGCGCTTCT    | PYD1-683R          | GCCCATACAGGAACTGTAGCTT   |
| PYD1-1054F          | AAAACCCTTTGCGCTGAGCT    | PYD1-1142R         | AAGTACTGCAGCGAATGCCCT    |
| EF1 $\alpha$ -471F  | TGAGCACGCTCTTCTTGCTTTCA | EF1 $\alpha$ -546R | GGTGGTGGCATCCATCTTGTTACA |
| EF1 $\alpha$ -1221F | TGGTGACGCTGGTATGGTTA    | EF1 $\alpha$ -1367 | TCCTTCTTGTCCACGCTCTT     |

**Table S4** PCR primers used in quantitative real-time RT-PCR analyses of 5'- and 3'-relative transcript levels for the *PYD1* gene and the reference gene *EF1 $\alpha$* .
