# Supplementary material for: A functional analysis of the pyrimidine catabolic pathway in Arabidopsis
Source: PubMed Central journal article supplement (PMC2713857; doi:10.1111/j.1469-8137.2009.02843.x), 2009-07
Supplement: nph0183-0117-SD5.pdf [file nph0183-0117-SD5.pdf]

| Sample                  | Soluble                | Insoluble              | Catabolic ( <sup>14</sup> CO <sub>2</sub> ) | Total Incorporated |
|-------------------------|------------------------|------------------------|---------------------------------------------|--------------------|
| WT Shoot                | 740.9 ± 16.4<br>[82.1] | 113.9 ± 29.7<br>[12.6] | 47.3 ± 6.4<br>[5.2]                         | 902.1 ± 115.9      |
| <i>PYD1,3-1/3</i> Shoot | 791.4 ± 64.5<br>[83.9] | 122.9 ± 23.9<br>[13.0] | 29.3 ± 4.5<br>[3.1]                         | 943.6 ± 80.4       |

**Table S5** [2-<sup>14</sup>C]-Uracil metabolism in leaves of 9-day-old liquid-cultured seedlings grown in 1/2x MS medium. Catabolic pathway activities were estimated by <sup>14</sup>CO<sub>2</sub> production (see Fig. 1) in wild-type Col-0 and RNAi line *PYD1,3-1/3*, which expresses *PYD1* at approximately 15% of levels found in wild type plants. Soluble, perchloric acid-soluble fraction; Insoluble, perchloric acid-insoluble fraction. Values are means ± standard error for four replicates. Significant differences ( $P < 0.05$ ) using unpaired, two-tailed *t*-tests, are marked with an asterisk. Values in brackets indicate the percentage of total incorporated Ura.
