# Supplementary material for: A functional analysis of the pyrimidine catabolic pathway in Arabidopsis
Source: PubMed Central journal article supplement (PMC2713857; doi:10.1111/j.1469-8137.2009.02843.x), 2009-07
Supplement: nph0183-0117-SD6.pdf [file nph0183-0117-SD6.pdf]

| <b>Enzyme</b>                           | <b>Gene</b>   | <b>Accession</b>       | <b>Organism</b>                 | <b>Reference</b>       | <b>Arabidopsis close homologue</b>       |
|-----------------------------------------|---------------|------------------------|---------------------------------|------------------------|------------------------------------------|
| <b>Reductive pathway</b>                |               |                        |                                 |                        |                                          |
| Dihydropyrimidine dehydrogenase         | <i>DPYD</i>   | NM_214044              | <i>Sus scrofa</i>               | Yokota et al. 1994     | At3g17810                                |
| Dihydropyrimidinase                     |               | At5g12200              | <i>Arabidopsis thaliana</i>     | Gojkovic et al. 2003   | At5g12200                                |
| β-ureidopropionase                      |               | At5g64370              | <i>Arabidopsis thaliana</i>     | Walsh et al. 2001      | At5g64370                                |
| β-alanine synthase                      |               | AAK60518               | <i>Saccharomyces kluyveri</i>   | Andersen B et al. 2008 | At5g43600                                |
| <b>Oxidative pathway</b>                |               |                        |                                 |                        |                                          |
| Uracil dehydrogenase                    |               | no gene identified yet |                                 |                        |                                          |
| Barbiturase                             | <i>bar</i>    | AJ320520               | <i>Rhodococcus erythropolis</i> | Soong et al. 2002      | none                                     |
| Ureidomalonase                          |               | no gene identified yet |                                 |                        |                                          |
| <b>RUT pathway</b>                      |               |                        |                                 |                        |                                          |
| Monoxygenase                            | <i>rutA</i>   | YP_002555908           | <i>Escherichia coli</i>         | Loh et al. 2006        | none                                     |
| Isochorismatase (putative)              | <i>rutB</i>   | YP_002386513           | <i>Escherichia coli</i>         | Loh et al. 2006        | none                                     |
| Endoribonuclease                        | <i>rutC</i>   | YP_002386512           | <i>Escherichia coli</i>         | Loh et al. 2006        | none                                     |
| Hydrolase (putative)                    | <i>rutD</i>   | YP_002386511           | <i>Escherichia coli</i>         | Loh et al. 2006        | none                                     |
| Nitroreductase                          | <i>rutE</i>   | YP_002386510           | <i>Escherichia coli</i>         | Loh et al. 2006        | none                                     |
| Flavin reductase                        | <i>rutF</i>   | YP_002386509           | <i>Escherichia coli</i>         | Loh et al. 2006        | none                                     |
| Pyrimidine permease                     | <i>rutG</i>   | YP_002555902           | <i>Escherichia coli</i>         | Loh et al. 2006        | none                                     |
| <b>URC pathway</b>                      |               |                        |                                 |                        |                                          |
| Cyclohydrolase (putative)               | <i>urc1</i>   | AY154654               | <i>Saccharomyces kluyveri</i>   | Andersen et al. 2008   | none                                     |
| Transcription factor                    | <i>urc2</i>   | AY154653               | <i>Saccharomyces kluyveri</i>   | Andersen et al. 2008   | none                                     |
| Urea amidohydrolase, urea carboxylase   | <i>urc3+5</i> | DQ512718               | <i>Saccharomyces kluyveri</i>   | Andersen et al. 2008   | partial homology to various carboxylases |
| unknown                                 | <i>urc4</i>   | DQ512719               | <i>Saccharomyces kluyveri</i>   | Andersen et al. 2008   | none                                     |
| Uracil phosphoribosyltransferase (UPRT) | <i>urc6</i>   | DQ512720               | <i>Saccharomyces kluyveri</i>   | Andersen et al. 2008   | 6 different proteins with UPRT domain    |

**Table S6** Compilation of genes and enzymes involved in the different pathways of pyrimidine degradation in various organisms and putative homologues identified in the Arabidopsis genome.
