# Supplementary material for: A functional analysis of the pyrimidine catabolic pathway in Arabidopsis
Source: PubMed Central journal article supplement (PMC2713857; doi:10.1111/j.1469-8137.2009.02843.x), 2009-07
Supplement: nph0183-0117-SD7.pdf [file nph0183-0117-SD7.pdf]

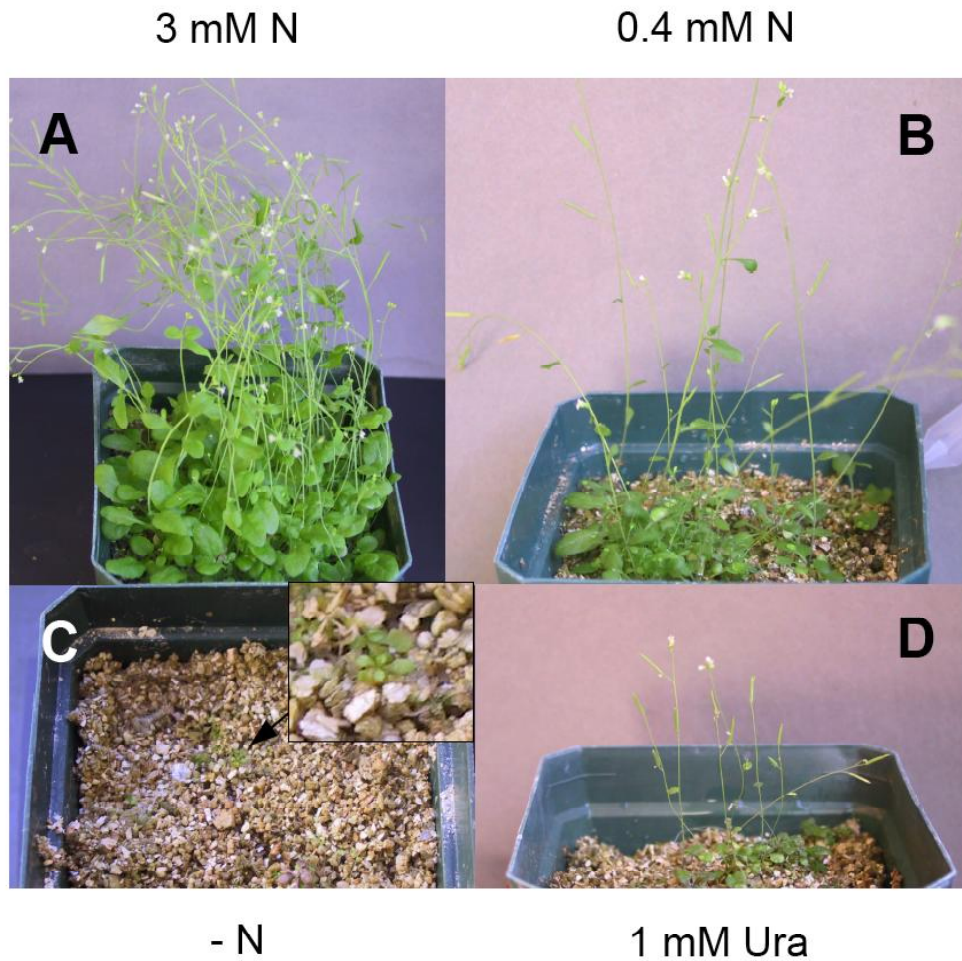

**Fig. S1** Phenotype of 6-week-old Arabidopsis seedlings grown on washed vermiculite potting medium and fertilized weekly with equal volumes of 1/2x MS medium containing either 3 mM N (1 mM  $\text{KNO}_3$  and 1 mM  $\text{NH}_4\text{NO}_3$ ), 0.4 mM N (0.13 mM  $\text{KNO}_3$  and 0.13 mM  $\text{NH}_4\text{NO}_3$ ), no nitrogen (- N) or 1 mM uracil (1 mM Ura) as the sole N source.
